# Supplementary material
Source: PubMed Central journal article supplement (PMC4574235)
Supplement: 10.1534_115.177170_genetics.115.177170-1.pdf [file 10.1534_115.177170_genetics.115.177170-1.pdf]

**Table S3 Effect on growth rate of marking parental *MTL*-homozygotes with resistance cassettes**

| strain          | Growth rate of strain with resistance cassette relative to that of the unmarked ancestral strain <sup>a</sup> , (actual rate in doublings /h) |                               |
|-----------------|-----------------------------------------------------------------------------------------------------------------------------------------------|-------------------------------|
|                 | YPD                                                                                                                                           | Harsh conditions <sup>b</sup> |
| Au35a           | 0.988 (1.019)                                                                                                                                 | 1.006 (0.551)                 |
| Au7a            | 1.001 (1.065)                                                                                                                                 | n/a                           |
| Au90a           | 0.969 (0.932)                                                                                                                                 | 0.939 (0.601)                 |
| RIHO11a         | 0.819 (0.963)                                                                                                                                 | n/a                           |
| W43a            | 0.949 (0.904)                                                                                                                                 | 1.001 (0.606)                 |
| HUN97 $\alpha$  | 0.999 (1.098)                                                                                                                                 | 0.971 (0.587)                 |
| OD8916 $\alpha$ | 0.997 (1.014)                                                                                                                                 | 0.994 (0.562)                 |
| W17 $\alpha$    | 0.612 (0.685)                                                                                                                                 | 1 <sup>c</sup> (0.000)        |
| Ysu63 $\alpha$  | 1.000 (1.063)                                                                                                                                 | 0.964 (0.583)                 |

<sup>a</sup> Calculated by dividing the average growth rates after  $\geq 100$  generations of serial propagation of strains with resistance cassettes by those of their unmarked *MTL*- homozygous ancestors.

<sup>b</sup> Rates were only determined for those strains that produced progeny that were tested under harsh conditions

<sup>c</sup> Neither W17 $\alpha$ , nor its marked version W17 $\alpha$  –pNZ11 grew under the harsh conditions.
