# Supplementary material
Source: PubMed Central journal article supplement (PMC4574235)
Supplement: 10.1534_115.177170_genetics.115.177170-4.pdf [file 10.1534_115.177170_genetics.115.177170-4.pdf]

**Table S1 Primers**

| Name                                          | Oligonucleotide Sequence (5' to 3')            |
|-----------------------------------------------|------------------------------------------------|
| M13pr                                         | AATTAACCCTCACTAAAGGGAACAAAAGCTGG               |
| Sacpf1                                        | ACTGGAGCTCATTTTATGATGGAATGAATGGG               |
| <i>MTLa1-F</i> <sup>a</sup>                   | TTGAAGCGTGAGAGGCTAGGAG                         |
| <i>MTLa1-R</i> <sup>a</sup>                   | GTTTGGGTTCCCTTCTTCTCATT                        |
| <i>MTL<math>\alpha</math>1-F</i> <sup>a</sup> | TTCGAGTACATTCTGGTCGCG                          |
| <i>MTL<math>\alpha</math>1-R</i> <sup>a</sup> | TGTAACATCCTCAATTGTACCCGA                       |
| ENOpf                                         | GGGATCAAGATTTGTTACAG                           |
| tetRWH11pr                                    | CCATGGTGAGACGCGACAGA                           |
| TRpf                                          | CTCGAGCCCGGGTGGACTTCTTCG                       |
| TRpr                                          | CTGCAGGTCGACTTTTCTGA G                         |
| IMH3pfatg                                     | ATGGTGTTTGAAACTCAAAG                           |
| IMH3pr                                        | CTCGAGTCTAGAACTCAGTATATCTT CA                  |
| TRpIMHp                                       | ATCTCAGAAAAGTCGACCTGCAGATGGTGT TTGAACTTC AAAAG |
| TS1pf                                         | GCGGCCGCCCGGGTCTTTCTTACTAAAATATAGA             |
| TS1pr                                         | GCGGCCGCGATCTTACACACACAATCAG                   |
| TS2pf                                         | AAGCTTAGAAGGAAAGAAGGAAAGAA                     |
| TS2pr                                         | AAGCTTCCCGGCCCTTATCATCATGATCACCA               |
| pNZ11pf                                       | CGAATTGGAGCTCATTTTATG                          |
| CaNATpr                                       | GGACATGGCATAGACATATAC                          |
| pACTFpf                                       | TGCCTCTTACCACTATTTC                            |
| TS1pr-p                                       | GCGGCCGCGATCTTACACA                            |
| TS1Fpf                                        | CACTACTACTACTACTACTAC                          |
| TRsepr                                        | GGTGTGGTCAATAAGAGCGA                           |
| TS2Fpr                                        | TACCTATGCACTACTACTACTC                         |
| CaACTpr                                       | CTAAAACATACCACCGTCCA                           |
| pENOpr                                        | ATCGTTAGTCAACTTTTGAAC                          |
| SSR1-2 <sup>b</sup>                           | CTAGTTCAGCCAAGGCTTCTTC                         |

Continued on next page

**Table S1, continued**

| Name                     | Oligonucleotide Sequence (5' to 3') |
|--------------------------|-------------------------------------|
| SSR1-3 <sup>b</sup>      | AGAAGAAGCCTTGGCTGAAC                |
| MCEA1outpf2 <sup>c</sup> | TGGGTCATGTGGTATTGGAG                |
| MCEA1outpr2 <sup>c</sup> | ATGGCCGGATGTTTCCAGAA                |
| MC0repf <sup>c</sup>     | AACCATCATGACGATCACCA                |
| MC0repr <sup>c</sup>     | GATAAATCTCATCTGCAGGC                |
| tetRpf                   | ATGTCTAGAT TAGATAAAAG TAAA          |
| tetRpr2                  | AGTCGTCATCAGTACCGGC                 |
| TS1se                    | CTCTCTCCTT TTGTTACGAG               |
| CaNATpf                  | CTACTACTTTGGATGATACTG               |

<sup>a</sup> designed by M. Legrand et al. (Legrand *et al.* 2004)

<sup>b</sup> designed by Z. Zhou (Zhou 2010).

<sup>c</sup> designed by N. Zhang et al. (Zhang *et al.* 2009)
