# Supplementary material
Source: PubMed Central journal article supplement (PMC4574235)
Supplement: 10.1534_115.177170_genetics.115.177170-5.pdf [file 10.1534_115.177170_genetics.115.177170-5.pdf]

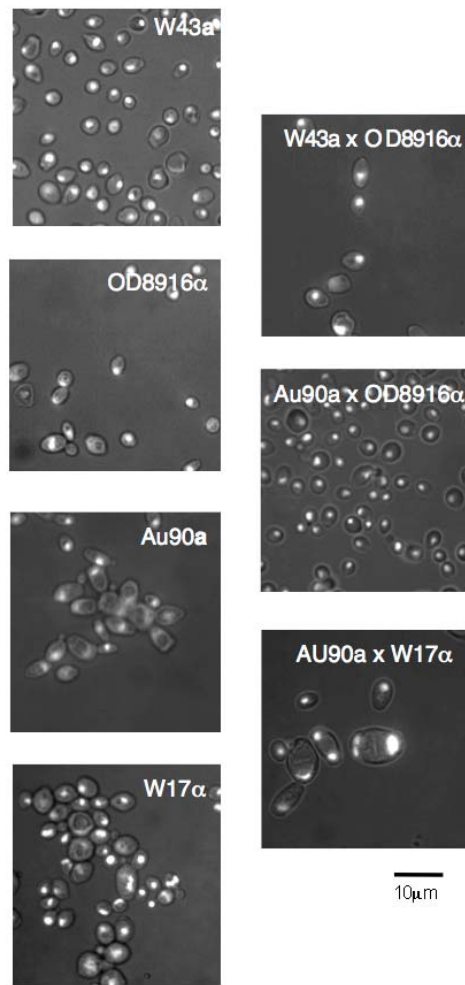

**Figure S3** Examples of nuclear staining (DAPI) of parents and fusants. Four parents, W43a, OD8916 $\alpha$ , AU90a, W17 $\alpha$ , and their fusants W43a x OD8916 $\alpha$ , AU90a x OD8916 $\alpha$  and AU90a x W17 $\alpha$  are shown. The photographic images were generated by combining fluorescent images and bright field images.
