# Supplementary material
Source: PubMed Central journal article supplement (PMC4574235)
Supplement: 10.1534_115.177170_genetics.115.177170-6.pdf [file 10.1534_115.177170_genetics.115.177170-6.pdf]

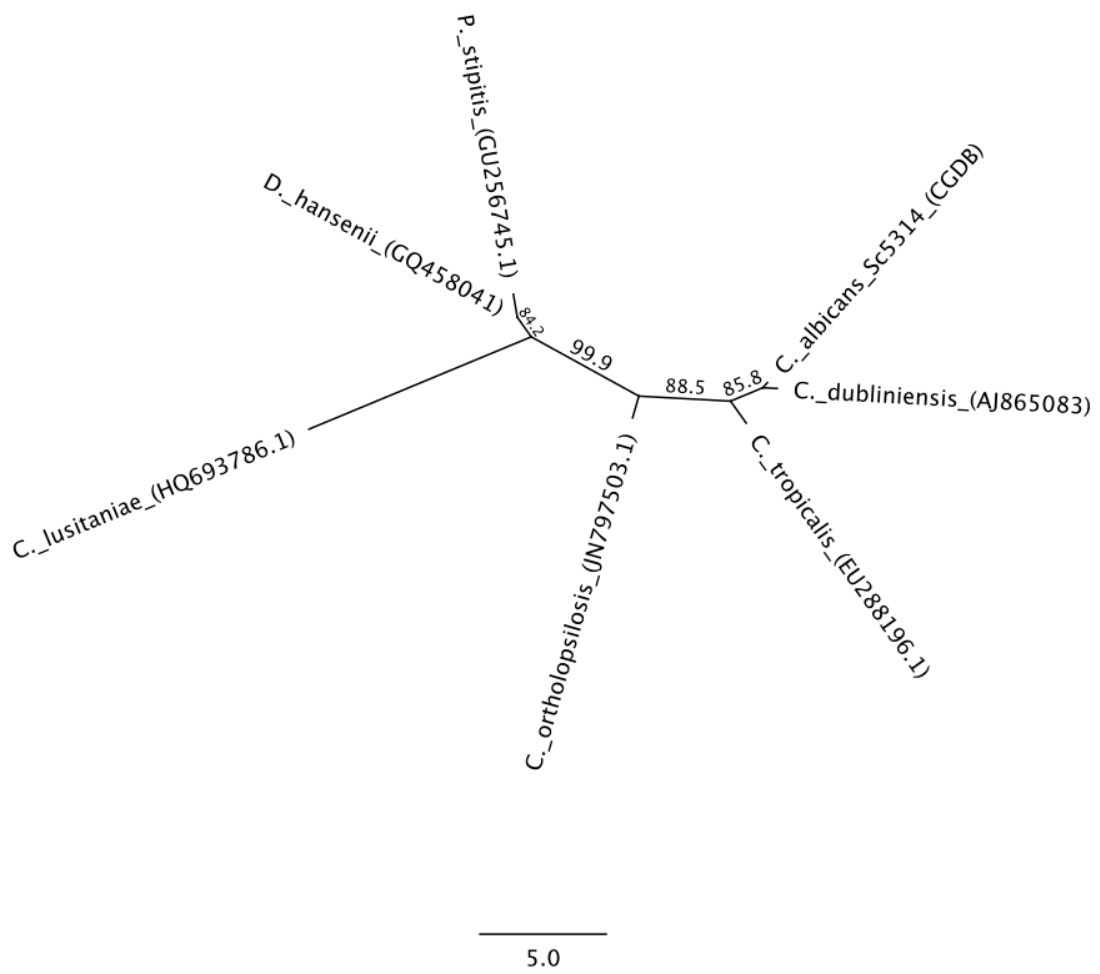

**Figure S1** Neighbor-joining consensus tree showing ITS1-based phylogenetic relationships between the species used in  $d_n/d_s$  analysis. Percentages of consensus support values of nodes below 100% are shown. The bar indicates 5 substitutions.
