# Supplementary material
Source: PubMed Central journal article supplement (PMC4574235)
Supplement: 10.1534_115.177170_genetics.115.177170-8.pdf [file 10.1534_115.177170_genetics.115.177170-8.pdf]

**Table S2 Parental strains and fusants detected in rat co-colonization model**

| Mating    | Inoculum | Parent 1 | Parent 2 | Fusants  |          |                         |    |        |
|-----------|----------|----------|----------|----------|----------|----------|----------|----------|----------|----------|----------|-------------------------|----|--------|
|           |          |          |          |          |          |          |          |          |          | Parent 1 | Parent 2 | Detected <sup>a,b</sup> |    |        |
| OD8916α x |          |          |          |          |          |          |          |          |          |          |          |                         |    | t = 28 |
| W43a      |          | t = 7 d  |          | t = 14 d |          | t = 21 d |          | t = 28 d |          | t = 7 d  | t = 14 d | t = 21 d                | d  |        |
|           | white    | Rat1     | 2.7E+03  | 3.0E+02  | 8.4E+03  | 0.0E+00  | 1.4E+04  | 0.0E+00  | 4.3E+03  | 0.0E+00  | 70       | 10                      | 0  | 0      |
|           |          | Rat2     | 2.2E+03  | 2.5E+02  | 1.1E+04  | 0.0E+00  | 1.1E+04  | 5.8E+02  | 1.7E+03  | 0.0E+00  | 80       | 20                      | 0  | 0      |
|           |          | Rat3     | 2.9E+01  | 1.5E+00  | 1.5E+04  | 7.7E+02  | 1.8E+04  | 0.0E+00  | 4.5E+03  | 0.0E+00  | 0        | 0                       | 0  | 0      |
| t = 28    |          |          |          |          |          |          |          |          |          |          |          |                         |    |        |
|           | white    | Rat1     | 3.7E+02  | 3.0E+02  | 6.6E+02  | 4.4E+02  | 3.2E+03  | 3.2E+03  | 2.1E+02  | 4.1E+03  | 10       | 10                      | 0  | 0      |
|           |          | Rat2     | 3.8E+02  | 4.6E+02  | 2.4E+02  | 2.0E+02  | 1.8E+03  | 2.8E+03  | 5.6E+02  | 5.1E+03  | 0        | 0                       | 0  | 0      |
|           |          | Rat3     | 3.0E+02  | 2.0E+02  | 6.7E+02  | 1.0E+03  | 3.3E+03  | 4.9E+03  | 3.4E+02  | 6.5E+03  | 30       | 0                       | 0  | 0      |
| t = 28    |          |          |          |          |          |          |          |          |          |          |          |                         |    |        |
|           | opaque   | Rat1     | 3.7E+02  | 3.0E+02  | 6.6E+02  | 4.4E+02  | 1.2E+03  | 2.2E+03  | 1.2E+02  | 2.3E+03  | 129      | 104                     | 30 | 0      |
|           |          | Rat2     | 3.8E+02  | 4.6E+02  | 2.4E+02  | 2.0E+02  | 5.8E+02  | 8.7E+02  | 6.3E+02  | 5.6E+03  | 82       | 0                       | 0  | 0      |
|           |          | Rat3     | 3.0E+02  | 2.0E+02  | 6.7E+02  | 1.0E+03  | 1.2E+03  | 1.8E+03  | 1.3E+02  | 2.5E+03  | 110      | 50                      | 0  | 0      |

Continued on next page

Table S2, continued

| Mating | Inoculum | Parent 1 | Parent 2 | Fusants                 |    |   |  |        |
|--------|----------|----------|----------|----------|----------|----------|----------|----------|----------|----------|----------|-------------------------|----|---|--|--------|
|        |          |          |          |          |          |          |          |          |          |          |          | Detected <sup>a,b</sup> |    |   |  |        |
|        |          |          |          |          |          |          |          |          |          |          |          |                         |    |   |  | t = 28 |
|        |          |          | t = 7 d  | t = 14 d | t = 21 d | t = 28 d | t = 7 d  | t = 14 d | t = 21 d | t = 28 d |          |                         |    |   |  |        |
|        | white    | Rat1     | 1.3E+03  | 8.7E+02  | 3.7E+03  | 0.0E+00  | 1.1E+03  | 0.0E+00  | 5.7E+02  | 0.0E+00  | 30       | 30                      | 0  | 0 |  |        |
|        |          | Rat2     | 2.4E+02  | 2.0E+02  | 2.8E+03  | 3.1E+02  | 1.0E+03  | 0.0E+00  | 3.6E+02  | 0.0E+00  | 10       | 50                      | 10 | 0 |  |        |
|        |          | Rat3     | 1.1E+03  | 2.8E+02  | 4.0E+03  | 0.0E+00  | 9.9E+02  | 0.0E+00  | 5.0E+02  | 0.0E+00  | 30       | 0                       | 0  | 0 |  |        |
| W17α x |          |          |          |          |          |          |          |          |          |          |          |                         |    |   |  | t = 28 |
| W43a   |          |          | t = 7 d  | t = 14 d | t = 21 d | t = 28 d | t = 7 d  | t = 14 d | t = 21 d | t = 28 d |          |                         |    |   |  |        |
|        | white    | Rat1     | 3.4E+02  | 2.8E+02  | 1.5E+03  | 0.0E+00  | 5.0E+03  | 2.7E+02  | 4.1E+03  | 2.2E+02  | 0        | 0                       | 0  | 0 |  |        |
|        |          | Rat2     | 0.0E+00  | 0.0E+00  | 1.0E+01  | 0.0E+00  | 1.3E+03  | 6.8E+01  | 4.5E+03  | 2.4E+02  | 0        | 0                       | 0  | 0 |  |        |
|        |          | Rat3     | 5.8E+02  | 3.8E+02  | 5.1E+02  | 2.7E+01  | 2.9E+03  | 0.0E+00  | 7.8E+03  | 0.0E+00  | 40       | 0                       | 0  | 0 |  |        |
|        |          |          |          |          |          |          |          |          |          |          |          |                         |    |   |  | t = 28 |
|        |          |          | t = 7 d  | t = 14 d | t = 21 d | t = 28 d | t = 7 d  | t = 14 d | t = 21 d | t = 28 d |          |                         |    |   |  |        |
|        | opaque   | Rat1     | 3.4E+02  | 2.8E+02  | 1.5E+03  | 0.0E+00  | 1.1E+03  | 5.6E+01  | 9.5E+02  | 5.0E+01  | 227      | 0                       | 0  | 0 |  |        |
|        |          | Rat2     | 0.0E+00  | 0.0E+00  | 2.0E+02  | 0.0E+00  | 8.4E+02  | 4.4E+01  | 7.8E+02  | 4.1E+01  | 0        | 0                       | 0  | 0 |  |        |
|        |          | Rat3     | 6.5E+02  | 4.3E+02  | 5.1E+02  | 2.7E+01  | 4.0E+03  | 0.0E+00  | 1.0E+03  | 0.0E+00  | 70       | 0                       | 0  | 0 |  |        |

Continued on next page

Table S2, continued

| Mating   | Inoculum |      | Parent 1 | Parent 2 | Fusants                 |          |          |   |
|----------|----------|------|----------|----------|----------|----------|----------|----------|----------|----------|-------------------------|----------|----------|---|
|          |          |      |          |          |          |          |          |          |          |          | Detected <sup>a,b</sup> |          |          |   |
| YSU63α x |          |      |          |          |          |          |          |          |          |          |                         | t = 28   |          |   |
| W43a     |          |      | t = 7 d  |          | t = 14 d |          | t = 21 d |          | t = 28 d |          | t = 7 d                 | t = 14 d | t = 21 d | d |
|          | white    | Rat1 | 5.0E+03  | 1.3E+03  | 2.9E+03  | 3.2E+02  | 1.3E+03  | 6.9E+01  | 3.8E+03  | 0.0E+00  | 0                       | 0        | 0        | 0 |
|          |          | Rat2 | 8.1E+03  | 9.0E+02  | 1.8E+03  | 0.0E+00  | 4.0E+03  | 0.0E+00  | 3.4E+03  | 0.0E+00  | 0                       | 0        | 0        | 0 |
|          |          | Rat3 | 1.2E+03  | 6.5E+01  | 1.4E+03  | 1.6E+02  | 2.7E+03  | 0.0E+00  | 3.9E+03  | 0.0E+00  | 0                       | 0        | 0        | 0 |
|          |          |      |          |          |          |          |          |          |          |          |                         | t = 28   |          |   |
|          | white    | Rat1 | t = 7 d  |          | t = 14 d |          | t = 21 d |          | t = 28 d |          | t = 7 d                 | t = 14 d | t = 21 d | d |
|          |          | Rat1 | 9.1E+02  | 1.6E+02  | 6.5E+01  | 0.0E+00  | 2.0E+03  | 1.0E+02  | 2.3E+03  | 0.0E+00  | 0                       | 0        | 0        | 0 |
|          |          | Rat2 | 4.3E+02  | 1.1E+02  | 3.2E+01  | 7.0E+00  | 7.6E+03  | 4.0E+02  | 2.6E+02  | 0.0E+00  | 0                       | 0        | 0        | 0 |
|          |          | Rat3 | 1.4E+03  | 3.5E+02  | 3.9E+02  | 0.0E+00  | 2.7E+03  | 0.0E+00  | 2.8E+02  | 0.0E+00  | 0                       | 0        | 0        | 0 |
|          |          |      |          |          |          |          |          |          |          |          |                         | t = 28   |          |   |
|          | opaque   | Rat1 | t = 7 d  |          | t = 14 d |          | t = 21 d |          | t = 28 d |          | t = 7 d                 | t = 14 d | t = 21 d | d |
|          |          | Rat1 | 3.9E+03  | 3.2E+03  | 3.6E+03  | 2.4E+03  | 1.3E+03  | 2.4E+03  | 2.4E+03  | 4.5E+04  | 0                       | 0        | 0        | 0 |
|          |          | Rat2 | 3.2E+03  | 4.0E+03  | 4.0E+03  | 3.3E+03  | 3.6E+03  | 5.4E+03  | 3.2E+04  | 2.9E+05  | 0                       | 0        | 0        | 0 |
|          |          | Rat3 | 4.7E+03  | 3.1E+03  | 4.3E+02  | 6.4E+02  | 3.0E+03  | 4.4E+03  | 1.1E+04  | 2.1E+05  | 0                       | 0        | 0        | 0 |

Continued on next page

Table S2, continued

| Mating   | Inoculum     | Parent 1 | Parent 2 | Fusants                 |   |   |   |        |        |
|----------|--------------|----------|----------|----------|----------|----------|----------|----------|----------|-------------------------|---|---|---|--------|--------|
|          |              |          |          |          |          |          |          |          |          | Detected <sup>a,b</sup> |   |   |   |        |        |
|          |              |          |          |          |          |          |          |          |          |                         |   |   |   | t = 28 |        |
|          |              |          | t = 7 d  | t = 14 d | t = 21 d | t = 28 d | t = 7 d  | t = 14 d | t = 21 d | t = 28 d                |   |   |   |        |        |
|          | opaque       | Rat1     | 6.1E+02  | 1.1E+03  | 7.3E+02  | 1.1E+03  | 1.1E+03  | 4.5E+02  | 1.2E+03  | 1.3E+02                 | 0 | 0 | 0 | 0      |        |
|          | <sup>c</sup> | Rat2     | 7.5E+02  | 1.4E+03  | 8.8E+02  | 8.8E+02  | 8.2E+02  | 2.1E+02  | 1.4E+03  | 7.6E+01                 | 0 | 0 | 0 | 0      |        |
|          |              | Rat3     | 4.8E+02  | 1.1E+03  | 7.0E+02  | 8.5E+02  | 8.4E+02  | 2.1E+02  | 9.7E+02  | 1.1E+02                 | 0 | 0 | 0 | 0      |        |
| HUN97α x |              |          |          |          |          |          |          |          |          |                         |   |   |   |        | t = 28 |
| Au90a    |              |          | t = 7 d  | t = 14 d | t = 21 d | t = 28 d | t = 7 d  | t = 14 d | t = 21 d | t = 28 d                |   |   |   |        |        |
|          | white        | Rat1     | 0.0E+00  | 7.3E+03  | 0.0E+00  | 2.1E+04  | 1.8E+02  | 3.5E+03  | 3.6E+02  | 6.9E+03                 | 0 | 0 | 0 | 0      |        |
|          |              | Rat2     | 1.9E+03  | 1.1E+04  | 0.0E+00  | 4.8E+02  | 3.2E+02  | 6.1E+03  | 3.7E+01  | 7.0E+02                 | 0 | 0 | 0 | 0      |        |
|          |              | Rat3     | 1.1E+03  | 9.8E+03  | 4.4E+02  | 8.4E+03  | 0.0E+00  | 5.8E+02  | 0.0E+00  | 5.8E+02                 | 0 | 0 | 0 | 0      |        |
|          |              |          |          |          |          |          |          |          |          |                         |   |   |   |        | t = 28 |
|          |              |          | t = 7 d  | t = 14 d | t = 21 d | t = 28 d | t = 7 d  | t = 14 d | t = 21 d | t = 28 d                |   |   |   |        |        |
|          | opaque       | Rat1     | 3.7E+02  | 4.5E+02  | 0.0E+00  | 2.2E+03  | 8.4E+01  | 1.6E+03  | 4.6E+01  | 8.8E+02                 | 0 | 0 | 0 | 0      |        |
|          |              | Rat2     | 5.9E+02  | 5.9E+02  | 0.0E+00  | 3.2E+03  | 9.8E+01  | 1.9E+03  | 1.9E+01  | 3.5E+02                 | 0 | 0 | 0 | 0      |        |
|          |              | Rat3     | 5.0E+02  | 7.5E+02  | 1.6E+02  | 3.1E+03  | 0.0E+00  | 2.2E+03  | 0.0E+00  | 4.1E+03                 | 0 | 0 | 0 | 0      |        |

Continued on next page

Table S2, continued

| Mating  | Inoculum     | Parent 1 | Parent 2 | Fusants                 |   |   |   |        |
|---------|--------------|----------|----------|----------|----------|----------|----------|----------|----------|-------------------------|---|---|---|--------|
|         |              |          |          |          |          |          |          |          |          | Detected <sup>a,b</sup> |   |   |   |        |
|         |              |          |          |          |          |          |          |          |          |                         |   |   |   | t = 28 |
|         |              |          | t = 7 d  | t = 14 d | t = 21 d | t = 28 d | t = 7 d  | t = 14 d | t = 21 d | t = 28 d                |   |   |   |        |
|         | opaque       | Rat1     | 6.4E+02  | 1.9E+03  | 5.5E+02  | 1.3E+03  | 7.0E+02  | 8.5E+02  | 9.0E+02  | 3.9E+02                 | 0 | 0 | 0 | 0      |
|         | <sup>d</sup> | Rat2     | 2.2E+02  | 6.0E+02  | 7.3E+02  | 1.1E+03  | 3.9E+02  | 5.8E+02  | 1.1E+03  | 3.7E+02                 | 0 | 0 | 0 | 0      |
|         |              | Rat3     | 3.7E+02  | 1.0E+03  | 4.6E+02  | 1.0E+03  | 4.2E+02  | 6.0E+02  | 8.7E+02  | 9.6E+01                 | 0 | 0 | 0 | 0      |
| FJ11α x |              |          |          |          |          |          |          |          |          |                         |   |   |   | t = 28 |
| Au90a   |              |          | t = 7 d  | t = 14 d | t = 21 d | t = 28 d | t = 7 d  | t = 14 d | t = 21 d | t = 28 d                |   |   |   |        |
|         | white        | Rat1     | 1.3E+03  | 1.5E+02  | 1.7E+03  | 0.0E+00  | 2.6E+03  | 0.0E+00  | 2.6E+03  | 0.0E+00                 | 0 | 0 | 0 | 0      |
|         |              | Rat2     | 3.1E+03  | 3.4E+02  | 3.3E+04  | 0.0E+00  | 2.3E+03  | 1.2E+02  | 2.4E+03  | 0.0E+00                 | 0 | 0 | 0 | 0      |
|         |              | Rat3     | 2.8E+02  | 1.5E+01  | 1.9E+03  | 1.0E+02  | 3.1E+03  | 0.0E+00  | 2.8E+03  | 0.0E+00                 | 0 | 0 | 0 | 0      |
|         |              |          |          |          |          |          |          |          |          |                         |   |   |   | t = 28 |
|         |              |          | t = 7 d  | t = 14 d | t = 21 d | t = 28 d | t = 7 d  | t = 14 d | t = 21 d | t = 28 d                |   |   |   |        |
|         | opaque       | Rat1     | 2.3E+03  | 4.0E+02  | 4.9E+03  | 0.0E+00  | 3.3E+03  | 1.7E+02  | 9.9E+02  | 0.0E+00                 | 0 | 0 | 0 | 0      |
|         |              | Rat2     | 2.5E+03  | 6.3E+02  | 2.0E+03  | 2.2E+02  | 2.1E+03  | 1.1E+02  | 5.1E+03  | 0.0E+00                 | 0 | 0 | 0 | 0      |
|         |              | Rat3     | 3.0E+03  | 7.4E+02  | 2.7E+03  | 0.0E+00  | 1.1E+03  | 0.0E+00  | 7.6E+02  | 0.0E+00                 | 0 | 0 | 0 | 0      |

Continued on next page

Table S2, continued

| Mating  | Inoculum |      | Parent 1 | Parent 2 | Fusants                 |          |          |        |
|---------|----------|------|----------|----------|----------|----------|----------|----------|----------|----------|-------------------------|----------|----------|--------|
|         |          |      |          |          |          |          |          |          |          |          | Detected <sup>a,b</sup> |          |          |        |
| FJ11α x |          |      |          |          |          |          |          |          |          |          |                         |          |          | t = 28 |
| W43a    |          |      | t = 7 d  |          | t = 14 d |          | t = 21 d |          | t = 28 d |          | t = 7 d                 | t = 14 d | t = 21 d | d      |
|         | white    | Rat1 | 4.0E+02  | 4.4E+01  | 4.4E+02  | 0.0E+00  | 9.9E+03  | 0.0E+00  | 1.0E+04  | 0.0E+00  | 0                       | 0        | 0        | 0      |
|         |          | Rat2 | 2.1E+02  | 2.3E+01  | 2.3E+02  | 0.0E+00  | 8.8E+03  | 4.6E+02  | 1.1E+03  | 0.0E+00  | 0                       | 0        | 0        | 0      |
|         |          | Rat3 | 8.3E+01  | 4.4E+00  | 8.3E+01  | 4.4E+00  | 4.8E+03  | 0.0E+00  | 9.5E+03  | 0.0E+00  | 0                       | 0        | 0        | 0      |
|         |          |      |          |          |          |          |          |          |          |          |                         |          |          | t = 28 |
|         | opaque   | Rat1 | 1.3E+03  | 3.3E+02  | 4.7E+03  | 0.0E+00  | 2.2E+03  | 2.5E+02  | 1.7E+03  | 0.0E+00  | 0                       | 0        | 0        | 0      |
|         |          | Rat2 | 1.5E+03  | 3.6E+02  | 3.2E+03  | 3.5E+02  | 1.5E+03  | 8.0E+01  | 3.1E+03  | 0.0E+00  | 0                       | 0        | 0        | 0      |
|         |          | Rat3 | 3.3E+03  | 8.3E+02  | 5.4E+03  | 0.0E+00  | 3.2E+03  | 0.0E+00  | 2.7E+03  | 0.0E+00  | 0                       | 0        | 0        | 0      |

<sup>a</sup> No fusants were detected when any of the inocula were plated out at t = 0 d

<sup>b</sup> Identification of fusants was not significantly affected by marker loss. When groups of three rats were inoculated with either an OD8916α x W43a or a W17α x W43a fusant, and cells were recovered from the rats over a period of four weeks and checked for the presence of *MTLa*, *MTL*<sup>Δ</sup>, *NAT*<sup>r</sup> or *MPA*<sup>r</sup> markers by PCR, only one out of 469 cells tested had lost one marker (*MPA*<sup>r</sup>)

<sup>c</sup> ratio of YSU63α:W43a in initial inoculum was 1:2

<sup>d</sup> ratio of HUN97α:W43a in initial inoculum was 2:1
