# Supplementary material
Source: PubMed Central journal article supplement (PMC4574235)
Supplement: 10.1534_115.177170_genetics.115.177170-9.pdf [file 10.1534_115.177170_genetics.115.177170-9.pdf]

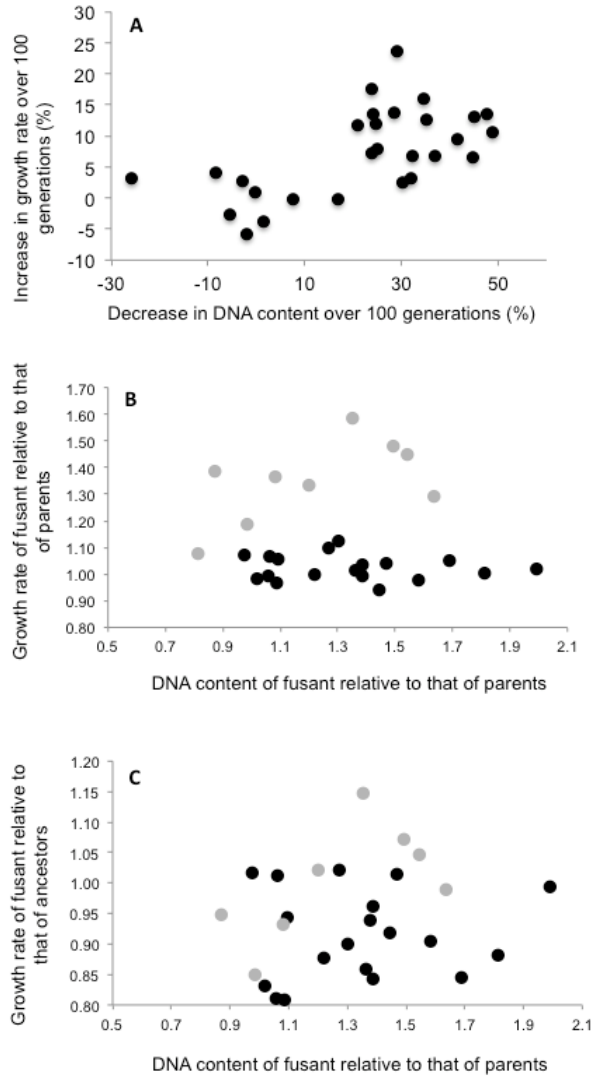

**Figure S6** Relationship between reduction in DNA content and increase in growth rate. (A) Fusant growth rate increase over 100 generations of serial propagation versus fusant DNA content decrease over 100 generations of serial propagation, in YPD for 28 representative fusants from all 15 successful matings (names of fusants used are shown in Figure S4). DNA content changes were estimated from flow cytometry. Apparent increases (negative values on x-axis) are most likely attributable to inaccuracy of this method and mainly associated with W17-derived fusants where flow cytometry peaks are ill-defined (Figure S2). (B) Relationship between growth rate and DNA content of fusants, both relative to those of parental averages, after 100 generations of propagation in YPD. Grey symbols represent values for W17-derived fusants. Growth rates of parents prior to propagation in YPD were used in these calculations. (C) Relationship between growth rate, relative to those of *MTL*-heterozygous ancestors, and DNA content of fusants, relative to those of their parents, after 100 generations of propagation in YPD. Growth rates of *MTL*-heterozygous ancestors after propagation in YPD were used in these calculations. Grey symbols in (B) and (C) represent values for W17-derived fusants.
