# Supplementary material
Source: PubMed Central journal article supplement (PMC4574235)
Supplement: 10.1534_115.177170_genetics.115.177170-12.pdf [file 10.1534_115.177170_genetics.115.177170-12.pdf]

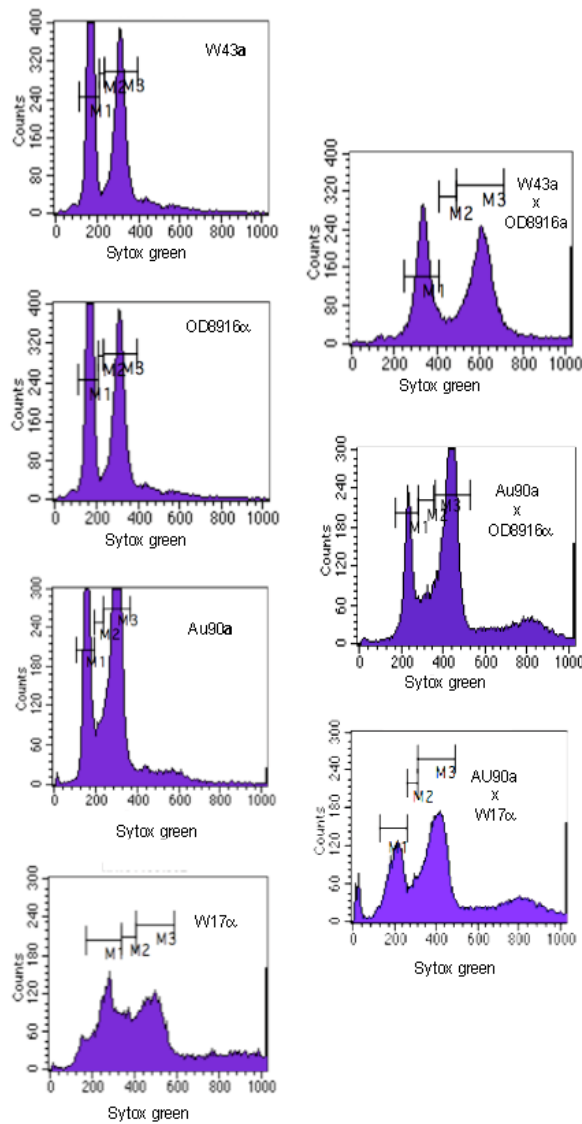

**Figure S2** Examples of flow cytometry analyses by SYTOX staining of fusants and parents. Four parents, W43a, OD8916 $\alpha$ , AU90a, W17 $\alpha$ , and their fusants W43a x OD8916 $\alpha$ , AU90a x OD8916 $\alpha$  and AU90a x W17 $\alpha$  are shown. M1 and M3 are peaks in the DNA content distribution corresponding to exponentially growing cells in their G1 and G2 phases, respectively. M2 corresponds to S phase cells. The peak regions were selected visually based on the shape of the histogram.
